# Supplementary material
Source: PubMed Central journal article supplement (PMC7962591)
Supplement: mmc1.pdf [file mmc1.pdf]

**Supplemental information**

**Neutralizing and protective human monoclonal  
antibodies recognizing the N-terminal  
domain of the SARS-CoV-2 spike protein**

**Naveenchandra Suryadevara, Swathi Shrihari, Pavlo Gilchuk, Laura A. VanBlargan, Elad Binshtein, Seth J. Zost, Rachel S. Nargi, Rachel E. Sutton, Emma S. Winkler, Elaine C. Chen, Mallorie E. Fouch, Edgar Davidson, Benjamin J. Doranz, Rita E. Chen, Pei-Yong Shi, Robert H. Carnahan, Larissa B. Thackray, Michael S. Diamond, and James E. Crowe Jr.**

**Supplementary Table 1. Sequence and functional features of NTD-reactive human monoclonal antibodies (mAbs), Related to Figure 1 and Figure S2.**

| MAb       | Antibody variable gene sequence features |                       |                |                 |                    |                | Neutralization IC <sub>50</sub> value (ng/mL) |                 | Reference                 |
|-----------|------------------------------------------|-----------------------|----------------|-----------------|--------------------|----------------|-----------------------------------------------|-----------------|---------------------------|
|           | Heavy chain                              |                       |                | Light chain     |                    |                | Pseudovirus or VSV                            | Authentic virus |                           |
|           | V <sub>H</sub> gene                      | CDR3 (amino acids)    | GenBank number | V gene          | CDR3 (amino acids) | GenBank number |                                               |                 |                           |
| COV2-2489 | <i>IGHV4-39</i>                          | ARQWKWFGAEAWYFDL      | MT665457       | <i>IGKV3-20</i> | QQYGSSPFT          | MT665070       | 56                                            | 199             | Zost <i>et al.</i> , 2020 |
| COV2-2676 | <i>IGHV1-69</i>                          | ARSCGDCYSADLDF        | MT665456       | <i>IGKV3-11</i> | QRRSNWPPFT         | MT665069       | 38                                            | 501             | Zost <i>et al.</i> , 2020 |
| 4A8       | <i>IGHV1-24</i>                          | ATSTAVAGTPDLFDYYYGMDV | MT622683       | <i>IGKV2-24</i> | TQATQFPYT          | MT622682       | 49,000                                        | 610             | Chi <i>et al.</i> , 2020  |
| 4-8       | <i>IGHV1-69</i>                          | ASLQTVDTAIEKYYGMDV    | MT712311       | <i>IGLV3-1</i>  | QAWDSSTAV          | MT712278       | 32                                            | 9               | Liu <i>et al.</i> , 2020  |

**Supplementary Table 2. Summary of electron microscopy data collection and statistics SARS-CoV-2<sub>ecto</sub> protein in complex with human Fabs, Related to Figure 2.**

|                    |                               | Structure of SARS-CoV-2 S6P <sub>ecto</sub> protein in complex with indicated Fab |                 |
|--------------------|-------------------------------|-----------------------------------------------------------------------------------|-----------------|
|                    |                               | Fab COV2-2489                                                                     | Fab COV2-2676   |
|                    | EMDB #:                       | EMD-23154                                                                         | EMD-23155       |
| Microscope setting | Microscope                    | TF-20                                                                             | TF-20           |
|                    | Voltage (kV)                  | 200                                                                               | 200             |
|                    | Detector                      | US-4000 CCD                                                                       | US-4000 CCD     |
|                    | Magnification                 | 50,000 $\times$                                                                   | 50,000 $\times$ |
|                    | Pixel size                    | 2.18                                                                              | 2.18            |
|                    | Exposure (e-/Å <sup>2</sup> ) | 30                                                                                | 30              |
|                    | Defocus range ( $\mu$ m)      | 1.5 to 1.8                                                                        | 1.5 to 1.8      |
| Data               | Micrographs, #                | 221                                                                               | 376             |
|                    | Particles, #                  | 39,108                                                                            | 44,443          |
|                    | Particles #, after 2D         | 36,081                                                                            | 16,960          |
|                    | Final particles, #            | 2,591                                                                             | 4,859           |
|                    | Symmetry                      | C1                                                                                | C1              |
| Model docking      | CoV-2-S CC                    | PDB: 7JJI 0.815                                                                   | PDB: 7JJI 0.939 |
|                    | Fab (PDB: 12E8) CC            | 0.908                                                                             | 0.91            |
